# Supplementary material
Source: MDPI journal article supplement (https://www.mdpi.com/2073-4344/13/3/497)
Supplement: s1 [file s1]

Supplementary Materials

**Catalysts based on Ni(Mg)Al-layered hydroxides prepared by mechanochemical method for the reaction of furfural hydrogenation**

Liudmila N. Stepanova <sup>1,\*</sup>, Elena O. Kobzar <sup>1</sup>, Mikhail V. Trenikhin <sup>1</sup>, Natalia N. Leont'eva <sup>1</sup>, Aleksandra N. Serkova <sup>2</sup>, Aleksey N. Salanov <sup>2</sup>, Aleksandr V. Lavrenov <sup>1</sup>

Center of New Chemical Technologies, Boreskov Institute of Catalysis, 54 Neftezhavodskaya Street,  
644040 Omsk, Russia

Correspondence: Lchem@yandex.ru

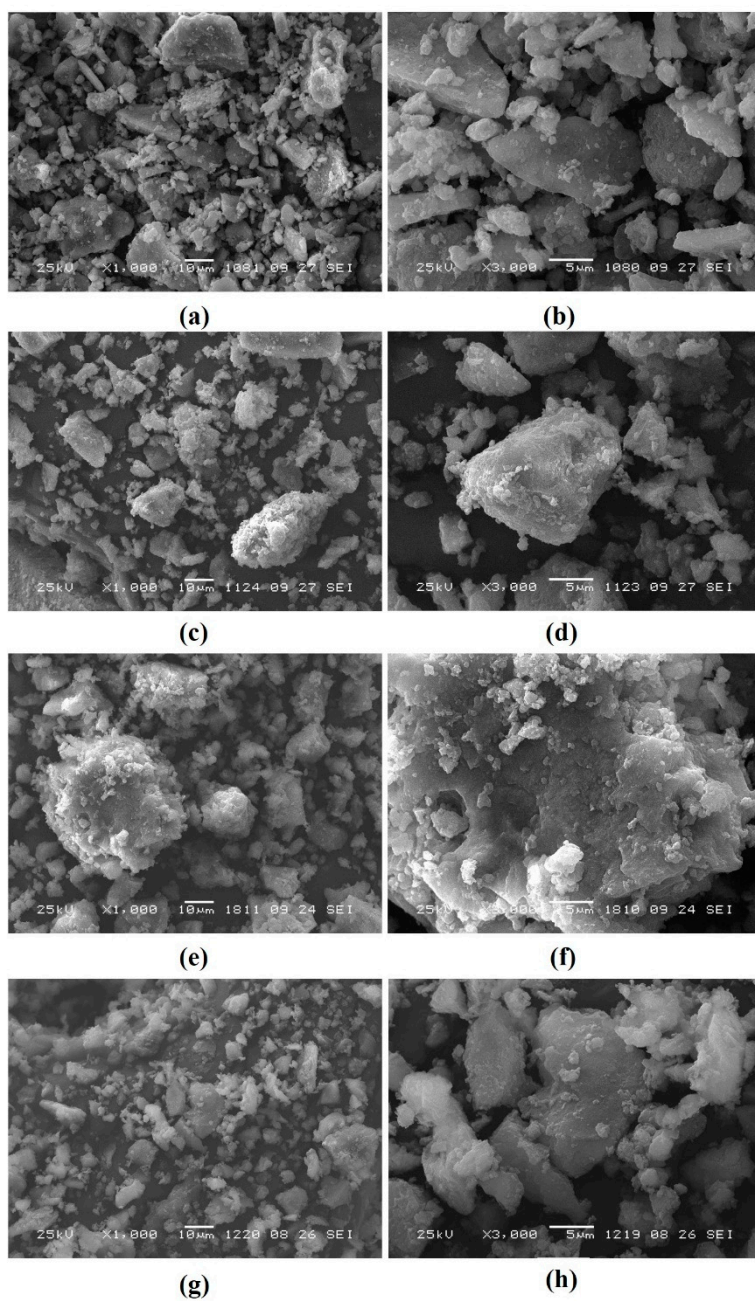

**Figure S1.** SEM images of the samples: 1 (a, b) – NiAl-3, 2 (a, b) – NiAl-4, 3 (a, b) – 0.5NiMgAl-4, 4 (a, b) – 0.3NiMgAl-4.

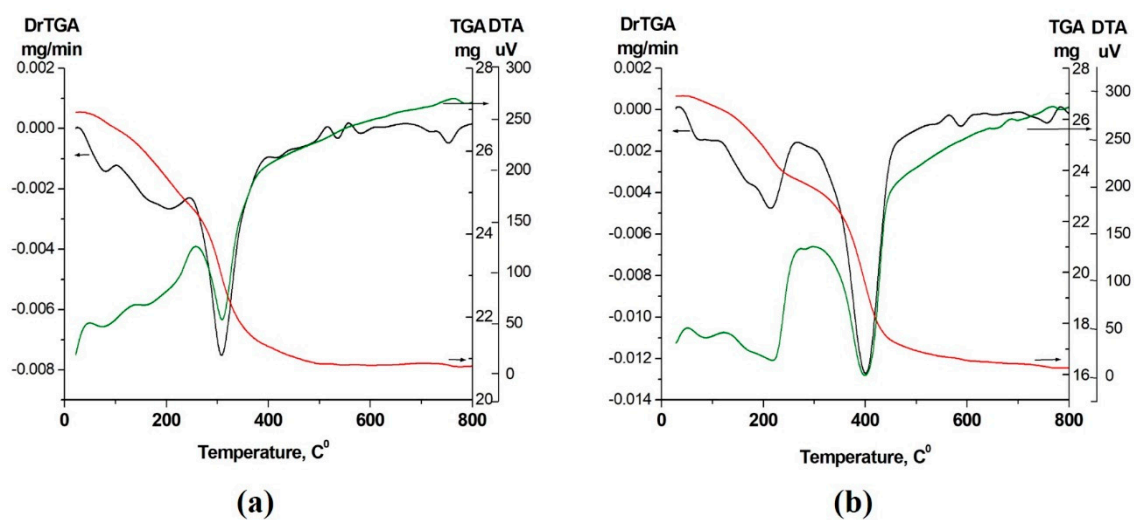

**Figure S2.** Curves of TG (red line), DrTG (black line), DTA (green line) of the samples: a – NiAl-4, b – 0.3NiMgAl-4.

**Table S1.** Yield of products of the reaction of FAL hydrogenation in the presence of Ni(Mg)Al-Red catalysts with different Ni/(Ni+Mg) and (Ni+Mg)/Al molar ratio (90°C, 2.0 MPa, stirring 1400 rpm, reaction time 220 min)

| Sample        | (Ni+Mg)/Al | Ni/(Ni+Mg) | Yield, % |       |        |                |
|---------------|------------|------------|----------|-------|--------|----------------|
|               |            |            | FOL      | THFOL | THFAL* | Other products |
| 0.1NiMgAl-2-R | 2          | 0.1        | 14.6     | 2.6   | 0.6    | 1.4            |
| 0.3NiMgAl-2-R |            | 0.3        | 39.7     | 59.0  | 0.5    | 0.2            |
| 0.5NiMgAl-2-R |            | 0.5        | 55.0     | 27.1  | 0.2    | 0.7            |
| 0.7NiMgAl-2-R |            | 0.7        | 38.0     | 3.3   | 1.7    | 0.0            |
| NiAl-2-R      |            | 1          | 46.0     | 5.0   | 2.0    | 0.0            |
| 0.3NiMgAl-3-R | 3          | 0.3        | 40.0     | 24.9  | 13.0   | 0.1            |
| 0.5NiMgAl-3-R |            | 0.5        | 38.3     | 60.7  | 0.0    | 0.0            |
| NiAl-3-R      |            | 1          | 45.6     | 4.6   | 1.8    | 0.0            |
| 0.3NiMgAl-4-R | 4          | 0.3        | 42.6     | 57.2  | 0.0    | 0.0            |
| 0.5NiMgAl-4-R |            | 0.5        | 30.0     | 69.4  | 0.0    | 0.0            |
| NiAl-4-R      |            | 1          | 45.0     | 3.8   | 2.4    | 0.8            |
